# Supplementary material
Source: publisher site journal article supplement (https://www.dovepress.com/article/397837)
Supplement: Supplementary file 1 [file get_supplementary_file.php]

**Manuscript Title:** The associations between inflammatory mediators and bone outcomes in postmenopausal women: a cross-sectional analysis of baseline data from The Prune Study

**SUPPLEMENTARY TABLES**

**Supplemental Table 1** Inflammatory markers, bone mineral density, and T-scores stratified by baseline BMI status

|  | **Normal-Weighta** | **Overweight/Obeseb** | ***P value*** |
| --- | --- | --- | --- |
| **Inflammatory Markers** |  |  |  |
| Serum hs-CRP (mg/L) | 1.27±1.15 | 2.34±1.96 | **<.001** |
| Plasma MCP-1 (pg/mL) | 101.37±24.56 | 101.54±23.86 | 0.960 |
| Plasma IL-1β (pg/mL) | 0.06±0.03 | 0.08±0.03 | **0.001** |
| Plasma IL-6 (pg/mL) | 0.58±0.23 | 0.72±0.23 | **<.001** |
| Plasma IL-8 (pg/mL) | 2.07±0.76 | 2.44±0.82 | **0.001** |
| Plasma TNF-α (pg/mL) | 0.82±0.29 | 0.96±0.26 | **0.001** |
| **Bone Mineral Density** |  |  |  |
| Total Body BMD (g/cm2) | 1.03±0.07 | 1.05±0.08 | 0.086 |
| Total Body T-score | –0.8±1.0 | –0.6±1.0 | 0.103 |
| Lumbar Spine BMD (g/cm2) | 0.86±0.09 | 0.91±0.09 | **<.001** |
| Lumbar Spine T-score | –1.6±0.8 | –1.1±0.8 | **<.001** |
| Total Hip BMD (g/cm2) | 0.77±0.06 | 0.84±0.08 | **<.001** |
| Total Hip T-score | –1.3±0.5 | –0.8±0.6 | **<.001** |
| Femoral Neck BMD (g/cm2) | 0.65±0.07 | 0.70±0.08 | **<.001** |
| Femoral Neck T-score | –1.7±0.6 | –1.3±0.7 | **<.001** |

**Notes:** Data are presented as mean ± SD; Differences between groups were compared using independent *t*-tests or Mann-Whitney U-Tests depending on data distribution; Significant *p*-values in bold; anormal-weight = subset of participants with normal-weight (BMI: 18.5–24.9 kg/m2) (n=52 for serum hs-CRP subset, n=88 for BMD/T-score and plasma cytokine subset); boverweight/obese = subset of participants with overweight/obesity (BMI>24.9 kg/m2) (n=54 for serum hs-CRP subset, n=95 for BMD/T-score and plasma cytokine subset).

**Abbreviations:** BMI, body mass index; BMD, bone mineral density; hs-CRP, high-sensitivity C-reactive protein; IL, interleukin; MCP, monocyte chemoattractant protein; SD, standard deviation; TNF, tumor necrosis factor.

**Supplemental Table 2** Correlation between inflammatory markers and demographics and anthropometric measurements

|  | **Age**  (years) | **Age at Menopause** (years) | **BMI**  (kg/m2) | **Body Fat**  (%) | **Android Fat**  (%) | **Gynoid Fat**  (%) | **VAT**  **Mass**  (kg) |
| --- | --- | --- | --- | --- | --- | --- | --- |
| **hs-CRP**  (mg/L) | 0.175 | 0.051 | **0.442****** | **0.436****** | **0.403****** | **0.305**** | **0.438****** |
| **MCP-1**  (pg/mL) | 0.144 | –0.075 | 0.078 | 0.134 | 0.111 | 0.133 | 0.110 |
| **IL-1β**  (pg/mL) | –0.082 | **0.197**** | **0.169*** | **0.224**** | **0.172*** | 0.116 | 0.119 |
| **IL-6**  (pg/mL) | 0.024 | 0.079 | **0.292****** | **0.398****** | **0.192**** | **0.197**** | **0.191**** |
| **IL-8**  (pg/mL) | 0.037 | 0.089 | **0.240**** | **0.236**** | **0.157*** | 0.115 | 0.122 |
| **TNF-α**  (pg/mL) | 0.016 | 0.059 | **0.252***** | **0.269***** | **0.217**** | **0.246***** | **0.183*** |

**Notes:** Significant Spearman correlation coefficients in bold. *p<.05,**p<.01, ***p<.001, ****p<.0001; (n=183).

**Abbreviations:** BMI, body mass index; hs-CRP, high-sensitivity C-reactive protein; IL, interleukin; MCP, monocyte chemoattractant protein; TNF, tumor necrosis factor; VAT, visceral adipose tissue.

**Supplemental Table 3** Correlation between inflammatory markers and femoral neck geometry and strength estimated by hip structural analysis using DXA

|  |  | **Narrow Neck** | | | | |
| --- | --- | --- | --- | --- | --- | --- |
|  |  | **CSA (cm2)** | **CSMI (cm4)** | **ZSM (cm3)** | **CT (cm)** | **BR** |
| **hs-CRP**  (mg/L) | Alla | 0.187 | 0.080 | 0.064 | 0.137 | –0.058 |
| NWb | 0.026 | –0.145 | –0.071 | 0.068 | –0.079 |
| O/Oc | 0.079 | 0.143 | 0.044 | –0.008 | 0.076 |
| **MCP-1**  (pg/mL) | All | 0.018 | 0.140 | 0.093 | –0.038 | 0.068 |
| NW | 0.091 | **0.220*** | 0.154 | 0.011 | 0.084 |
| O/O | –0.032 | 0.062 | 0.047 | –0.060 | 0.046 |
| **IL-1β**  (pg/mL) | All | 0.004 | –0.040 | –0.044 | 0.034 | –0.009 |
| NW | –0.180 | **–0.234*** | **–0.277**** | –0.067 | 0.073 |
| O/O | 0.025 | 0.053 | 0.075 | –0.010 | –0.003 |
| **IL-6**  (pg/mL) | All | 0.028 | 0.007 | 0.010 | 0.050 | –0.019 |
| NW | –0.167 | **–0.211*** | **–0.232*** | –0.093 | 0.063 |
| O/O | 0.011 | 0.077 | 0.070 | –0.009 | 0.027 |
| **IL-8**  (pg/mL) | All | 0.047 | 0.033 | 0.010 | 0.038 | –0.006 |
| NW | –0.123 | –0.039 | –0.116 | –0.084 | 0.089 |
| O/O | 0.023 | –0.032 | –0.012 | –0.003 | –0.013 |
| **TNF-α**  (pg/mL) | All | 0.077 | 0.095 | 0.074 | 0.069 | –0.013 |
| NW | –0.016 | 0.002 | –0.018 | 0.026 | 0.015 |
| O/O | 0.018 | 0.075 | 0.052 | –0.052 | 0.074 |
|  |  | **Intertrochanter** | | | | |
|  |  | **CSA (cm2)** | **CSMI (cm4)** | **ZSM (cm3)** | **CT (cm)** | **BR** |
| **hs-CRP**  (mg/L) | Alla | **0.219*** | 0.133 | 0.164 | **0.191*** | –0.170 |
| NWb | 0.057 | 0.039 | 0.060 | 0.086 | –0.053 |
| O/Oc | 0.049 | –0.004 | –0.019 | 0.057 | –0.053 |
| **MCP-1**  (pg/mL) | All | 0.074 | **0.183*** | 0.141 | –0.006 | 0.080 |
| NW | 0.038 | 0.197 | 0.142 | –0.094 | 0.163 |
| O/O | 0.146 | 0.188 | 0.159 | 0.071 | 0.013 |
| **IL-1β**  (pg/mL) | All | –0.046 | –0.077 | –0.058 | –0.032 | 0.031 |
| NW | **–0.311**** | **–0.319**** | **–0.290**** | –0.206 | 0.108 |
| O/O | –0.005 | –0.033 | –0.053 | –0.012 | 0.079 |
| **IL-6**  (pg/mL) | All | 0.032 | –0.018 | 0.014 | 0.019 | –0.032 |
| NW | **–0.231*** | **–0.249*** | –0.207 | –0.134 | 0.027 |
| O/O | 0.027 | –0.014 | –0.034 | 0.008 | 0.046 |
| **IL-8**  (pg/mL) | All | 0.059 | 0.079 | 0.089 | 0.035 | 0.016 |
| NW | –0.178 | –0.049 | –0.070 | –0.186 | 0.158 |
| O/O | 0.078 | 0.044 | 0.027 | 0.100 | –0.010 |
| **TNF-α**  (pg/mL) | All | 0.059 | 0.105 | 0.117 | –0.021 | 0.055 |
| NW | –0.052 | –0.010 | –0.015 | –0.070 | 0.062 |
| O/O | –0.035 | 0.071 | 0.040 | –0.167 | **0.210*** |
|  |  | **Femoral Shaft** | | | | |
|  |  | **CSA (cm2)** | **CSMI (cm4)** | **ZSM (cm3)** | **CT (cm)** | **BR** |
| **hs-CRP**  (mg/L) | Alla | **0.242*** | 0.115 | 0.170 | **0.232*** | –0.188 |
| NWb | 0.057 | 0.002 | 0.057 | 0.073 | –0.084 |
| O/Oc | 0.118 | –0.004 | 0.016 | 0.182 | –0.134 |
| **MCP-1**  (pg/mL) | All | 0.120 | **0.200**** | **0.184*** | 0.004 | 0.050 |
| NW | **0.146*** | **0.346*** | **0.295**** | –0.063 | 0.124 |
| O/O | 0.123 | 0.099 | 0.129 | 0.053 | –0.008 |
| **IL-1β**  (pg/mL) | All | –0.032 | –0.059 | –0.058 | 0.000 | –0.002 |
| NW | **–0.242*** | **–0.266*** | **–0.277**** | –0.097 | 0.018 |
| O/O | –0.058 | –0.018 | –0.016 | –0.041 | 0.039 |
| **IL-6**  (pg/mL) | All | 0.039 | 0.008 | 0.021 | 0.035 | –0.019 |
| NW | **–0.224*** | –0.191 | –0.204 | –0.115 | 0.060 |
| O/O | –0.006 | –0.032 | –0.015 | 0.038 | –0.037 |
| **IL-8**  (pg/mL) | All | 0.053 | 0.056 | 0.077 | 0.005 | 0.028 |
| NW | –0.149 | –0.055 | –0.065 | –0.157 | 0.126 |
| O/O | 0.020 | –0.015 | 0.030 | 0.047 | –0.027 |
| **TNF-α**  (pg/mL) | All | 0.020 | 0.115 | 0.092 | –0.088 | 0.130 |
| NW | –0.064 | –0.024 | –0.061 | –0.076 | 0.073 |
| O/O | –0.139 | 0.101 | 0.067 | **–0.261*** | **0.278**** |

**Notes:** Significant Spearman correlation coefficients in bold. *p<.05,**p<.01; aAll = correlation in all participants (n=106 for serum hs-CRP, n=183 for plasma cytokines); bNW, normal weight = correlation in subset of participants with normal-weight (BMI: 18.5–24.9 kg/m2) (n=52 for serum hs-CRP subset, n=88 for plasma cytokine subset); cO/O, overweight/obese = correlation in subset of participants with overweight/obesity (BMI>24.9 kg/m2) (n=54 for serum hs-CRP subset, n=95 for plasma cytokine subset)

**Abbreviations:** BMI, body mass index; BR, buckling ratio; CSA, cross-sectional area; CSMI, cross-sectional moment of inertia; CT, cortical thickness; DXA, dual-energy X-ray absorptiometry; ZSM, Z-section modulus.

**Supplemental Table 4** Unadjusted and fully adjusted linear regression models describing the relationship between inflammatory markers and BMD outcomes

| **Total Body BMD** | | | | | |
| --- | --- | --- | --- | --- | --- |
|  | **Unadjusted** | | **Adjusted** | | |
|  | **β** | ***P* value** | **β** | ***P* value** | **R2 (%)** |
| hs-CRP | 0.022 | 0.315 | 0.018 | 0.483 | 7.43 |
| MCP-1 | 0.000 | 0.924 | 0.0004 | 0.204 |
| IL-1β | 0.017 | 0.912 | 0.026 | 0.921 |
| IL-6 | –0.034 | 0.392 | –0.133 | 0.087 |
| IL-8 | –0.032 | 0.418 | –0.028 | 0.649 |
| TNF-α | –0.011 | 0.780 | –0.027 | 0.688 |
| **Lumbar Spine BMD** | | | | | |
|  | **Unadjusted** | | **Adjusted** | | |
|  | **β** | ***P* value** | **β** | ***P* value** | **R2 (%)** |
| hs-CRP | 0.065 | 0.013 | 0.057 | 0.088 | 10.39 |
| MCP-1 | 0.000 | 0.936 | 0.001 | 0.022 |
| IL-1β | 0.009 | 0.961 | –0.136 | 0.669 |
| IL-6 | 0.016 | 0.718 | –0.108 | 0.238 |
| IL-8 | –0.032 | 0.485 | –0.008 | 0.910 |
| TNF-α | –0.005 | 0.905 | –0.048 | 0.564 |
| **Femoral Neck BMD** | | | | | |
|  | **Unadjusted** | | **Adjusted** | | |
|  | **β** | ***P* value** | **β** | ***P* value** | **R2 (%)** |
| hs-CRP | 0.035 | 0.108 | 0.002 | 0.911 | 19.85 |
| MCP-1 | 0.000 | 0.679 | 0.000 | 0.835 |
| IL-1β | 0.102 | 0.524 | –0.086 | 0.724 |
| IL-6 | 0.009 | 0.820 | –0.023 | 0.736 |
| IL-8 | 0.027 | 0.484 | 0.020 | 0.718 |
| TNF-α | 0.047 | 0.229 | 0.000 | 0.990 |
| **Total Hip BMD** | | | | | |
|  | **Unadjusted** | | **Adjusted** | | |
|  | **β** | ***P* value** | **β** | ***P* value** | **R2 (%)** |
| hs-CRP | 0.055 | 0.016 | 0.022 | 0.379 | 26.28 |
| MCP-1 | 0.000 | 0.832 | 0.000 | 0.917 |
| IL-1β | –0.034 | 0.834 | –0.270 | 0.282 |
| IL-6 | 0.030 | 0.450 | –0.024 | 0.730 |
| IL-8 | 0.014 | 0.716 | 0.039 | 0.500 |
| TNF-α | –0.001 | 0.960 | –0.059 | 0.360 |

**Notes:** Unadjusted models represent simple linear regressions with each inflammatory marker as a single independent predictor; Adjusted models represent fully adjusted multiple linear regression with all inflammatory markers and covariates included in the same model; covariates include BMI (kg/m2), age (y), age at menopause (y), weekly physical activity (min); high-magnitude loading exercise (min); dietary alcohol intake (g); dietary vitamin D intake (μg); dietary calcium intake (mg); brief calcium assessment score; (n=183)

**Abbreviations**: BMD, bone mineral density; BMI; body mass index; hs-CRP, high-sensitivity C-reactive protein; IL, interleukin; MCP, monocyte chemoattractant protein; TNF, tumor necrosis factor.
